# Supplementary material for: A FERM-adjacent (FA) region defines a subset of the 4.1 superfamily and is a potential regulator of FERM domain function
Source: PubMed Central journal article supplement (PMC1459144; doi:10.1186/1471-2164-7-85), 2006-04-20
Supplement: 1471-2164-7-85-S1.pdf [file 1471-2164-7-85-S1.pdf]

## Additional file.

**Table 1. Proteins identified in an HMM search of the Uniprot (Swiss-Prot/Trembl) database**

| Sequence     | Accession | Description                          | From | To   | Score | E-value  | N   |
|--------------|-----------|--------------------------------------|------|------|-------|----------|-----|
| -----        | -----     | ---                                  | ---- | ---- | ----- | -----    | --- |
| 41_BOVIN     | (Q9N179)  | Protein 4.1 (Band 4.1) (P4.1) (4.1R) | 286  | 342  | 102.8 | 2.30E-25 | 1   |
| E41L3_MOUSE  | (Q9WV92)  | Band 4.1-like protein 3 (4.1B)       | 402  | 460  | 102   | 4.10E-25 | 1   |
| Q8BGK4_MOUSE | (Q8BGK4)  | Mus musculus 13 days embryo for      | 402  | 460  | 102   | 4.10E-25 | 1   |
| Q5DTQ8_MOUSE | (Q5DTQ8)  | MKIAA4056 protein (Fragment)         | 536  | 592  | 101.7 | 5.10E-25 | 1   |
| 41_MOUSE     | (P48193)  | Protein 4.1 (Band 4.1) (P4.1) (4.1R) | 496  | 552  | 101.7 | 5.10E-25 | 1   |
| Q5R604_PONPY | (Q5R604)  | Hypothetical protein DKFZp459B0      | 285  | 343  | 101.4 | 5.90E-25 | 1   |
| Q5M7X2_RAT   | (Q5M7X2)  | Hypothetical protein                 | 396  | 454  | 101.4 | 5.90E-25 | 1   |
| Q6PA55_XENLA | (Q6PA55)  | MGC68473 protein                     | 392  | 450  | 101.4 | 5.90E-25 | 1   |
| Q9JMB3_RAT   | (Q9JMB3)  | Type II brain 4.1                    | 397  | 455  | 101.4 | 5.90E-25 | 1   |
| Q5RBV8_PONPY | (Q5RBV8)  | Hypothetical protein DKFZp469E0      | 198  | 256  | 101.4 | 5.90E-25 | 1   |
| Q4VAG6_XENTR | (Q4VAG6)  | Hypothetical protein (Fragment)      | 431  | 489  | 101.4 | 5.90E-25 | 1   |
| Q95JK9_MACFA | (Q95JK9)  | Hypothetical protein (Fragment)      | 398  | 456  | 101.4 | 5.90E-25 | 1   |
| Q4VB86_HUMAN | (Q4VB86)  | Hypothetical protein (Fragment)      | 406  | 462  | 101   | 7.90E-25 | 1   |
| 41_HUMAN     | (P11171)  | Protein 4.1 (Band 4.1) (P4.1) (4.1R) | 495  | 551  | 101   | 7.90E-25 | 1   |
| Q5TB35_HUMAN | (Q5TB35)  | Erythrocyte membrane protein ba      | 495  | 551  | 101   | 7.90E-25 | 1   |
| Q4VB87_HUMAN | (Q4VB87)  | Hypothetical protein (Fragment)      | 300  | 356  | 101   | 7.90E-25 | 1   |
| Q5TB33_HUMAN | (Q5TB33)  | Erythrocyte membrane protein ba      | 286  | 342  | 101   | 7.90E-25 | 1   |
| Q59F12_HUMAN | (Q59F12)  | Protein 4.1 variant (Fragment)       | 512  | 568  | 101   | 7.90E-25 | 1   |
| Q5TB36_HUMAN | (Q5TB36)  | Erythrocyte membrane protein ba      | 460  | 516  | 101   | 7.90E-25 | 1   |
| 41_CANFA     | (Q6Q7P4)  | Protein 4.1 (Band 4.1) (P4.1) (4.1R) | 496  | 552  | 100.9 | 8.30E-25 | 1   |
| Q7ZXJ6_XENLA | (Q7ZXJ6)  | Epb4.1l3 protein (Fragment)          | 393  | 451  | 99.1  | 3.10E-24 | 1   |
| Q8IUU7_HUMAN | (Q8IUU7)  | EPB41L1 protein (OTTHUMP0000003)     | 381  | 439  | 98.8  | 3.70E-24 | 1   |
| Q80U34_MOUSE | (Q80U34)  | MKIAA0338 protein (Fragment)         | 409  | 467  | 98.8  | 3.70E-24 | 1   |
| Q9WTP0_RAT   | (Q9WTP0)  | Rat brain 4.1(S)                     | 381  | 439  | 98.8  | 3.70E-24 | 1   |
| Q9WTP1_RAT   | (Q9WTP1)  | Rat brain 4.1(L)                     | 381  | 439  | 98.8  | 3.70E-24 | 1   |
| E41L1_MOUSE  | (Q9Z2H5)  | Band 4.1-like protein 1              | 381  | 439  | 98.8  | 3.70E-24 | 1   |
| E41L1_HUMAN  | (Q9H4G0)  | Band 4.1-like protein 1              | 381  | 439  | 98.8  | 3.70E-24 | 1   |
| Q6ZT61_HUMAN | (Q6ZT61)  | Hypothetical protein FLJ44927        | 350  | 408  | 98.8  | 3.70E-24 | 1   |
| Q96L65_HUMAN | (Q96L65)  | Erythrocyte membrane protein 4.      | 381  | 439  | 98.8  | 3.70E-24 | 1   |
| Q8K204_MOUSE | (Q8K204)  | Epb4.1l1 protein                     | 381  | 439  | 98.8  | 3.70E-24 | 1   |
| Q4VXN4_HUMAN | (Q4VXN4)  | OTTHUMP00000030825                   | 381  | 439  | 98.8  | 3.70E-24 | 1   |
| Q4VXM8_HUMAN | (Q4VXM8)  | OTTHUMP00000030826                   | 284  | 342  | 98.8  | 3.70E-24 | 1   |
| Q96CV5_HUMAN | (Q96CV5)  | Erythrocyte membrane protein         | 319  | 377  | 98.8  | 3.70E-24 | 1   |
| 41_XENLA     | (P11434)  | Cytoskeletal protein 4.1             | 478  | 534  | 98.3  | 5.30E-24 | 1   |
| Q6DCU8_XENLA | (Q6DCU8)  | LOC397741 protein                    | 477  | 533  | 98.3  | 5.30E-24 | 1   |
| E41L3_HUMAN  | (Q9Y2J2)  | Band 4.1-like protein 3 (4.1B)       | 394  | 452  | 97.8  | 7.50E-24 | 1   |

|              |          |                                              |     |     |      |          |   |
|--------------|----------|----------------------------------------------|-----|-----|------|----------|---|
| Q69ZT8_MOUSE | (Q69ZT8) | MKIAA0987 protein (Fragment)                 | 201 | 259 | 97.8 | 7.50E-24 | 1 |
| Q9JMB2_RAT   | (Q9JMB2) | Type II brain 4.1 minor isoform              | 397 | 455 | 97.8 | 7.50E-24 | 1 |
| Q8N4C4_HUMAN | (Q8N4C4) | EPB41L2 protein                              | 503 | 561 | 97.5 | 8.90E-24 | 1 |
| Q5T4F0_HUMAN | (Q5T4F0) | OTTHUMP00000017197                           | 503 | 561 | 97.5 | 8.90E-24 | 1 |
| Q59FD8_HUMAN | (Q59FD8) | EPB41L2 protein variant                      | 506 | 564 | 97.5 | 8.90E-24 | 1 |
| Q68DV2_HUMAN | (Q68DV2) | Hypothetical protein DKFZp781H1              | 503 | 561 | 97.5 | 8.90E-24 | 1 |
| E41L2_HUMAN  | (O43491) | Band 4.1-like protein 2                      | 503 | 561 | 97.5 | 8.90E-24 | 1 |
| Q5RC68_PONPY | (Q5RC68) | Hypothetical protein DKFZp459F2              | 495 | 553 | 97.5 | 9.00E-24 | 1 |
| E41L2_MOUSE  | (O70318) | Band 4.1-like protein 2                      | 496 | 556 | 96.9 | 1.40E-23 | 1 |
| Q8C928_MOUSE | (Q8C928) | Mus musculus 7 days neonate cer              | 488 | 548 | 96.9 | 1.40E-23 | 1 |
| Q80UE5_MOUSE | (Q80UE5) | Protein 4.1G                                 | 496 | 556 | 96.9 | 1.40E-23 | 1 |
| Q80UE3_MOUSE | (Q80UE3) | Protein 4.1G                                 | 496 | 556 | 96.9 | 1.40E-23 | 1 |
| Q811B2_MOUSE | (Q811B2) | Protein 4.1G                                 | 496 | 556 | 96.9 | 1.40E-23 | 1 |
| Q811C0_MOUSE | (Q811C0) | 4.1G protein (Fragment)                      | 234 | 294 | 96.9 | 1.40E-23 | 1 |
| Q80UE4_MOUSE | (Q80UE4) | Protein 4.1G                                 | 496 | 556 | 96.9 | 1.40E-23 | 1 |
| Q5U540_XENLA | (Q5U540) | Epb4.1l3 protein (Fragment)                  | 285 | 348 | 96.3 | 2.10E-23 | 1 |
| Q5R6C1_PONPY | (Q5R6C1) | Hypothetical protein DKFZp459E1              | 394 | 452 | 95.9 | 2.70E-23 | 1 |
| Q8C8P2_MOUSE | (Q8C8P2) | Mus musculus adult retina cDNA,              | 381 | 438 | 92.8 | 2.30E-22 | 1 |
| Q68EI5_BRARE | (Q68EI5) | Zgc:92004                                    | 374 | 432 | 90.5 | 1.20E-21 | 1 |
| E41LB_MOUSE  | (Q9JMC8) | Band 4.1-like protein 4B                     | 375 | 435 | 88   | 6.60E-21 | 1 |
| Q5VX11_HUMAN | (Q5VX11) | Erythrocyte membrane protein ba              | 375 | 435 | 85.2 | 4.70E-20 | 1 |
| E41LB_HUMAN  | (Q9H329) | Band 4.1-like protein 4B                     | 361 | 421 | 85.2 | 4.70E-20 | 1 |
| Q59GC2_HUMAN | (Q59GC2) | Erythrocyte membrane protein ba              | 78  | 138 | 85.2 | 4.70E-20 | 1 |
| Q5VX12_HUMAN | (Q5VX12) | Erythrocyte membrane protein ba              | 375 | 435 | 85.2 | 4.70E-20 | 1 |
| Q9NX84_HUMAN | (Q9NX84) | Hypothetical protein FLJ20381                | 297 | 357 | 85.2 | 4.70E-20 | 1 |
| Q91VS8_MOUSE | (Q91VS8) | FERM, RhoGEF and pleckstrin domains          | 329 | 386 | 83.2 | 1.90E-19 | 1 |
| Q8K2R0_MOUSE | (Q8K2R0) | Farp1 protein (Fragment)                     | 112 | 168 | 83   | 2.20E-19 | 1 |
| Q8IZ12_HUMAN | (Q8IZ12) | EPB41L5 protein                              | 333 | 388 | 80.7 | 1.10E-18 | 1 |
| Q4ZG32_HUMAN | (Q4ZG32) | Hypothetical protein EPB41L5                 | 333 | 388 | 80.7 | 1.10E-18 | 1 |
| E41L5_HUMAN  | (Q9HCM4) | Band 4.1-like protein 5                      | 333 | 388 | 80.7 | 1.10E-18 | 1 |
| Q7Z5S1_HUMAN | (Q7Z5S1) | Erythrocyte membrane protein ba              | 333 | 388 | 80.7 | 1.10E-18 | 1 |
| Q6IQ29_HUMAN | (Q6IQ29) | FARP1 protein                                | 325 | 381 | 80.5 | 1.20E-18 | 1 |
| Q9Y4F1_HUMAN | (Q9Y4F1) | CDEP (FERM, RhoGEF, and pleckst              | 325 | 381 | 80.5 | 1.20E-18 | 1 |
| Q5RAB8_PONPY | (Q5RAB8) | Hypothetical protein DKFZp469C0              | 325 | 381 | 80.5 | 1.20E-18 | 1 |
| Q9MYU8_CANFA | (Q9MYU8) | Band4.1-like5 protein                        | 333 | 388 | 80.3 | 1.30E-18 | 1 |
| Q58CU2_BOVIN | (Q58CU2) | Erythrocyte membrane protein ba              | 333 | 388 | 79.6 | 2.30E-18 | 1 |
| Q69ZG8_MOUSE | (Q69ZG8) | MKIAA1548 protein (Fragment)                 | 383 | 438 | 79.3 | 2.80E-18 | 1 |
| Q99KZ8_MOUSE | (Q99KZ8) | Epb4.1l5 protein (Mus musculus)              | 333 | 388 | 79.3 | 2.80E-18 | 1 |
| Q8BSC9_MOUSE | (Q8BSC9) | Mus musculus 12 days embryo emb              | 333 | 388 | 79.3 | 2.80E-18 | 1 |
| Q8BGS1_MOUSE | (Q8BGS1) | Mus musculus 9.5 days embryo pa              | 333 | 388 | 79.3 | 2.80E-18 | 1 |
| Q5FVG2_RAT   | (Q5FVG2) | Erythrocyte protein band 4.1-like 5          | 333 | 388 | 79.2 | 3.00E-18 | 1 |
| Q6NYK4_BRARE | (Q6NYK4) | Erythrocyte membrane protein band 4.1-like 5 | 340 | 392 | 77.1 | 1.30E-17 | 1 |
| Q6PNC5_BRARE | (Q6PNC5) | Mosaic eyes                                  | 333 | 385 | 77.1 | 1.30E-17 | 1 |
| Q86LF2_DROME | (Q86LF2) | LD13416p                                     | 206 | 264 | 76.7 | 1.60E-17 | 1 |
| Q9W0R3_DROME | (Q9W0R3) | CG1228-PA, isoform A                         | 302 | 360 | 76.7 | 1.60E-17 | 1 |
| Q8IRJ0_DROME | (Q8IRJ0) | CG1228-PB, isoform B                         | 141 | 199 | 76.7 | 1.60E-17 | 1 |
| Q8WSF2_DROME | (Q8WSF2) | Split central complex                        | 324 | 382 | 76.7 | 1.60E-17 | 1 |

|              |          |                                                   |     |     |      |          |   |
|--------------|----------|---------------------------------------------------|-----|-----|------|----------|---|
| Q8JG61_BRARE | (Q8JG61) | Protein 4.1                                       | 286 | 340 | 76.3 | 2.20E-17 | 1 |
| Q8BQQ4_MOUSE | (Q8BQQ4) | Protein tyrosine phosphatase, non-receptor type 4 | 319 | 376 | 76.1 | 2.60E-17 | 1 |
| PTN4_HUMAN   | (P29074) | Tyrosine-protein phosphatase, non-receptor type 4 | 319 | 376 | 76.1 | 2.60E-17 | 1 |
| Q8AW25_BRARE | (Q8AW25) | Novel protein similar to KIAA15                   | 262 | 314 | 75.6 | 3.60E-17 | 1 |
| Q61JK1_CAEER | (Q61JK1) | Hypothetical protein CBG09764                     | 319 | 376 | 75.5 | 3.80E-17 | 1 |
| PTP1_CAEEL   | (P28191) | Tyrosine-protein phosphatase 1                    | 319 | 376 | 75.5 | 3.80E-17 | 1 |
| Q8N3Y5_HUMAN | (Q8N3Y5) | FRMD3 protein (OTTHUMP00000021541)                | 125 | 185 | 75.5 | 3.80E-17 | 1 |
| Q5R803_PONPY | (Q5R803) | Hypothetical protein DKFZp469K0                   | 319 | 379 | 75.5 | 3.80E-17 | 1 |
| Q53EP2_HUMAN | (Q53EP2) | FERM domain containing 3 variant                  | 303 | 363 | 75.5 | 3.80E-17 | 1 |
| Q86WP8_HUMAN | (Q86WP8) | Protein band 4.1-like protein 4                   | 275 | 335 | 75.5 | 3.80E-17 | 1 |
| Q8IW02_HUMAN | (Q8IW02) | FERM domain containing 3                          | 303 | 363 | 75.5 | 3.80E-17 | 1 |
| Q8N9L2_HUMAN | (Q8N9L2) | Hypothetical protein FLJ36962                     | 223 | 283 | 75.5 | 3.80E-17 | 1 |
| Q9WU22_MOUSE | (Q9WU22) | Testis-enriched protein tyrosine phosphatase      | 319 | 376 | 74.5 | 7.40E-17 | 1 |
| Q9VFU8_DROME | (Q9VFU8) | CG9764-PA (LD33734p)                              | 348 | 401 | 73.6 | 1.50E-16 | 1 |
| Q95RU5_DROME | (Q95RU5) | LD11531p                                          | 105 | 158 | 73.6 | 1.50E-16 | 1 |
| Q86PA5_DROME | (Q86PA5) | LD27491p                                          | 8   | 67  | 73.3 | 1.80E-16 | 1 |
| Q5SPU1_MOUSE | (Q5SPU1) | FERM domain containing 3                          | 329 | 389 | 72   | 4.40E-16 | 1 |
| Q8BHD4_MOUSE | (Q8BHD4) | Similar to 2310003M01RIK PROTEIN                  | 319 | 379 | 72   | 4.40E-16 | 1 |
| Q5SPU0_MOUSE | (Q5SPU0) | FERM domain containing 3                          | 329 | 389 | 72   | 4.40E-16 | 1 |
| Q7QB86_ANOGA | (Q7QB86) | ENSANGP00000011297 (Fragment)                     | 273 | 326 | 70.9 | 9.40E-16 | 1 |
| Q8WU27_HUMAN | (Q8WU27) | FARP2 protein                                     | 329 | 386 | 70.5 | 1.20E-15 | 1 |
| O94887_HUMAN | (O94887) | KIAA0793 protein (Fragment)                       | 330 | 387 | 70.5 | 1.20E-15 | 1 |
| Q6NSM6_BRARE | (Q6NSM6) | Zgc:85963                                         | 364 | 425 | 69.5 | 2.40E-15 | 1 |
| Q6NRP9_XENLA | (Q6NRP9) | MGC83117 protein                                  | 319 | 379 | 69.4 | 2.60E-15 | 1 |
| Q6DCH9_XENLA | (Q6DCH9) | MGC83117 protein                                  | 319 | 379 | 69.4 | 2.60E-15 | 1 |
| E41L4_BRARE  | (O57457) | Band 4.1-like protein 4 (Nbl4 protein)            | 307 | 362 | 69.2 | 2.90E-15 | 1 |
| Q6P982_BRARE | (Q6P982) | Epb4.114 protein                                  | 307 | 362 | 69.2 | 2.90E-15 | 1 |
| Q9V9Y3_DROME | (Q9V9Y3) | CG11339-PA                                        | 284 | 337 | 67.6 | 9.10E-15 | 1 |
| Q8JFS7_BRARE | (Q8JFS7) | Novel protein tyrosine phosphatase                | 319 | 376 | 67.1 | 1.30E-14 | 1 |
| Q9GP93_CAEEL | (Q9GP93) | Ferm domain family protein 2                      | 329 | 390 | 66.9 | 1.50E-14 | 1 |
| Q6DJ46_XENTR | (Q6DJ46) | Erythrocyte membrane protein band 4.1 like 4A     | 307 | 364 | 66.7 | 1.70E-14 | 1 |
| Q6NRR3_XENLA | (Q6NRR3) | MGC82292 protein                                  | 307 | 369 | 65.8 | 3.10E-14 | 1 |
| 41_DROME     | (Q9V8R9) | Protein 4.1 homolog (Coracle protein)             | 319 | 375 | 64.4 | 8.40E-14 | 1 |
| Q8MLI7_DROME | (Q8MLI7) | CG11949-PD, isoform D                             | 319 | 375 | 64.4 | 8.40E-14 | 1 |
| Q7T0Z9_XENLA | (Q7T0Z9) | Epb4.115-prov protein                             | 333 | 384 | 64.3 | 9.10E-14 | 1 |
| Q61L91_CAEER | (Q61L91) | Hypothetical protein CBG09029                     | 346 | 407 | 63   | 2.20E-13 | 1 |
| Q91VX6_MOUSE | (Q91VX6) | Epb4.114a protein                                 | 307 | 364 | 61.9 | 4.60E-13 | 1 |
| E41LA_HUMAN  | (Q9HCS5) | Band 4.1-like protein 4A (NBL4 protein)           | 307 | 364 | 60.4 | 1.30E-12 | 1 |
| O17905_CAEEL | (O17905) | Hypothetical protein frm-3                        | 334 | 391 | 57.6 | 9.10E-12 | 1 |
| Q610U6_CAEER | (Q610U6) | Hypothetical protein CBG17296                     | 334 | 391 | 57.6 | 9.10E-12 | 1 |
| Q9XV97_CAEEL | (Q9XV97) | Hypothetical protein frm-1                        | 317 | 368 | 49.4 | 2.80E-09 | 1 |
| Q7YSV5_CAEEL | (Q7YSV5) | Hypothetical protein frm-1                        | 328 | 379 | 49.4 | 2.80E-09 | 1 |
| Q9TVI9_CAEEL | (Q9TVI9) | Hypothetical protein frm-1                        | 317 | 368 | 49.4 | 2.80E-09 | 1 |
| O18673_CAEEL | (O18673) | Hypothetical protein frm-1                        | 317 | 368 | 49.4 | 2.80E-09 | 1 |
| Q86P10_DROME | (Q86P10) | RE05264p                                          | 224 | 280 | 49.2 | 3.10E-09 | 1 |
| Q9VKY7_DROME | (Q9VKY7) | CG5022-PA                                         | 304 | 360 | 49.2 | 3.10E-09 | 1 |
| Q7PTB6_ANOGA | (Q7PTB6) | ENSANGP00000007560 (Fragment)                     | 330 | 385 | 48.5 | 5.10E-09 | 1 |

|              |          |                                         |     |     |      |          |   |
|--------------|----------|-----------------------------------------|-----|-----|------|----------|---|
| E41LA_MOUSE  | (P52963) | Band 4.1-like protein 4A (NBL4 protein) | 307 | 362 | 47.6 | 9.50E-09 | 1 |
| Q7PVA6_ANOGA | (Q7PVA6) | ENSANGP00000009134                      | 316 | 370 | 42.5 | 3.20E-07 | 1 |
| Q9VN68_DROME | (Q9VN68) | CG31536-PC, isoform C (SD09116p)        | 360 | 404 | 41.8 | 5.40E-07 | 1 |
| Q61LU2_CAEBR | (Q61LU2) | Hypothetical protein CBG08758           | 323 | 377 | 40.2 | 1.60E-06 | 1 |
| Q5JX99_HUMAN | (Q5JX99) | Novel protein                           | 167 | 230 | 39.3 | 2.90E-06 | 1 |
| Q6ZUT3_HUMAN | (Q6ZUT3) | Hypothetical protein FLJ43346           | 287 | 350 | 39.3 | 2.90E-06 | 1 |
| Q5JU84_HUMAN | (Q5JU84) | OTTHUMP00000021543 (Fragment)           | 88  | 137 | 37.4 | 1.10E-05 | 1 |
| Q7Q844_ANOGA | (Q7Q844) | ENSANGP00000018824 (Fragment)           | 304 | 361 | 35.9 | 3.20E-05 | 1 |
| Q8NMG4_HUMAN | (Q8NMG4) | Hypothetical protein FLJ33253           | 290 | 343 | 35.4 | 4.50E-05 | 1 |
| Q8BXT6_MOUSE | (Q8BXT6) | Mus musculus adult retina cDNA,         | 216 | 269 | 35.4 | 4.50E-05 | 1 |
| Q8C0K0_MOUSE | (Q8C0K0) | Mus musculus adult male thymus cDNA     | 216 | 269 | 35.4 | 4.50E-05 | 1 |
| Q6PFH6_MOUSE | (Q6PFH6) | A930004K21Rik protein                   | 216 | 269 | 35.4 | 4.50E-05 | 1 |
| Q6P5H6_MOUSE | (Q6P5H6) | RIKEN cDNA A930004K21                   | 305 | 358 | 35.4 | 4.50E-05 | 1 |
| Q7Z6J6_HUMAN | (Q7Z6J6) | MGC14161 protein                        | 305 | 358 | 35.4 | 4.50E-05 | 1 |
| Q52L19_XENLA | (Q52L19) | Hypothetical protein (Fragment)         | 116 | 179 | 32.2 | 0.00042  | 1 |
| Q8GUI3_ARATH | (Q8GUI3) | Hypothetical protein (At5g61270)        | 354 | 412 | 32   | 0.00048  | 1 |
| Q7PX95_ANOGA | (Q7PX95) | ENSANGP00000020346                      | 341 | 379 | 22.4 | 0.069    | 1 |
| Q580X3_HUMAN | (Q580X3) | Hypothetical protein PTPN4 (Fragment)   | 273 | 310 | 22   | 0.077    | 1 |
| Q7PWX8_ANOGA | (Q7PWX8) | ENSANGP00000017385 (Fragment)           | 267 | 319 | 15.6 | 0.48     | 1 |

The table shows the results of an HMM search for sequences that contain the FA domain. The database used was the Uniprot Knowledgebase (2,024,194 entries, indexed 03-Jul-2005).
