# Supplementary material for: A FERM-adjacent (FA) region defines a subset of the 4.1 superfamily and is a potential regulator of FERM domain function
Source: BMC Genomics. 2006 Apr 20;7:85. doi: 10.1186/1471-2164-7-85 (PMC1459144; doi:10.1186/1471-2164-7-85)
Supplement: Additional File 2 — Extended alignment of FERM proteins. The figure shows an alignment of 14 human FERM proteins. The sequences are aligned to 4.1R from Lobe B of the FERM domain, through the 16 kDa fragment. The FA region is shaded blue; Lobe B is shaded red; Lobe C is shaded green. Note that the sequence similarity in the FA region is only found in the FA proteins (41_HUMAN; E4L1_HUMAN; E4L2_HUMAN; E4L3_HUMAN; E4LB_HUMAN; Q9Y4F1; E41LA_HUMAN; Q86WP8). The other proteins (EZRI_HUMAN; TLN1_HUMAN; JAK3_HUMAN; FAK2_HUMAN; PTN3_HUMAN; PTN4_HUMAN) do not contain the FA region, and show no significant similarity in this region. Note too that the sequence similarity in the 16 kDa fragment of 4.1R only extends to the FA regions, and no further. [file 1471-2164-7-85-S2.pdf]

**Additional file 2. Alignment of a selection of human FERM proteins from Lobe 2 through the 16 kDa fragment of 4.1R**

## FERM Lobe B

PTN3\_HUMAN QTRHLYFLQLKMDICERLRLTCLPLNSAVVLLASVAVQSHFGDYNSSIHHPGVLSDSHFIPDQ-----NEDFLTQVESLHEQHS-GLKQSEAESCYINIAITLDFYGVELHSGRDLHNLD  
PTN4\_HUMAN YTRYQYFLQIKQDITLRLPCPSNTAALLASFAVQSELGDYDQSENLSGLVLDYSFIPNQ-----PQDFEKEIAKLHQHI-GLSPAEEAFNYLNTARTLELYGVFHYARDQSNNE  
41\_HUMAN ITRYYLCLQLRQDIAERLPCSFATLALLGSYTIQSELGDYDPELHGVDYVDFKLAPNQ-----TKLEEKVMEHLKSYR-SMTPAQADLEFLENAKKLSMYGVDLHKAKDLEGVD  
E4L1\_HUMAN ITRYYLCLQLRADITLRLPCSFVTHALLGSYTAQAEELGDYDAEEHVGNVVEELRFAPNQ-----TRELEERIMELHKTYRGMTPEGAEIFHLENAKKLSMYGVDLHH-AKDSEGLD  
E4L2\_HUMAN ITRYFLCLQLRQDIASERLPCSFVTHALLGSYTLQAEELGDYDPEEHGSDILEFQFAPTO-----TKLEEKVAELHKTTHRGSLSPAQADSQFLENAKRLSMYGVDLHH-AKDSEGLD  
E4L3\_HUMAN ITRYYLCLQLRDDIVSRLPCSFVTHALLGSYTVQSELGDYDPECGSDYIIEFRFAPN-----TKLEEKVIELHKSIRGMTPAEAMHFLNAKKLSMYGVDLHH-AKDSEGLD  
E4LB\_HUMAN FTRYLFLVQLRHDLSGKLKCPYLAELVLAALCLQAEELGECLELPEHTPELVSEFRFIPNQ-----TEAMEFDLIFQRWKECRGKSPAQAEHLNKAWLMSYGVDLHVVRGDGCEFY  
Q9Y4F1 LTRYLFAQVQKQDLAQGLRLTNDTSAAALLISHIVQSEIGDFDEALDR-EHLAKNKYIPQ-----DAEDKIVEFHNNHI-GQTPAESDFQLLEIARRLEMYGIRLHPAKDREGTK  
E41LA\_HUMA ITRYQFFLQVQKQDVQLQRLPCPVNTAAQLGAYAIQSELGDYDPYKHTAGVSEYRFVPDQ-----KEELEAETERIHKTLTGQIPSEAEINYLRTAKSLEMYGVDLHPVYGENKSE  
Q86WP8 LTRYLLYLQIKRDIIFHGRLLCSFSDAAYILGACIVQAEELGDYDPEHPENYIIEFEIFPKQ-----SQKLERKIVEIHKNELRGQSPVPAEFNLLLKAHTLETYGVDPHPCKDSTGTT  
EZRI\_HUMAN ITQKLFFLQVKEGILSDEIYCPPEFVALLGSYTAQAKFGDYNKEVHKSGYLSERLIPQRVMDQHKLTRDQWEDRIQVWHAEH-RGMLKDNAMELEYLKAQDLEMYGINYFEIKNKKGTD  
TLN1\_HUMAN VQLNLLYVQARDIDRLSHPVSFDKACEFAGFQCQIQFEPHNEQKHKAGFDLKDFLPKYEVKQKGERKIFQAHHKNCQMSIEAKVRYVKLARSCLKTYGVSFFLVKEKMKMGKNKLVPRL  
JAK3\_HUMAN LEHLFAQHRSDLVSGRLPVGLSLKEQGECLSLAVLDLARMAREQAQRPGELKTVSYKACLPPSLRDLIQC-SFVTRRIRRTVRRALRRVAAQADRHSLMAKYIMDLERLDPAAGAAET  
FAK2\_HUMAN TLLLYFYQQRLNDYMQRYASKVSEGMALQGLGCLERLRRFFKMDPHNALDKKSNFELLEKEVGQLDLFFPKQMQENLKPQKQRFMIQQTFQQYASLREEECVMKFFNTLAGFANIDQETRYCE  
Consensus/51% lTRYbbbLQl+pDIILsGRlScbsTAALLtSasVQtELGDYDspcHssYlS-b+FbPsQ.....scLEcKlbcLHKpap.sbssstbpbpbpst+pbpbtpbH.s+Dppts-

### FERM Lobe C

FERM domain ← → 16 kDa fragment

PTN3\_HUMAN LMIETASAGVAVRKYICTSF---YFVNILKISFKRKKFFHQKQKAESREHIVANMLNY--RSCNKLWKSCEVHHTFFQAKLLLPQEKNVLSQYWTMGSR-----  
PTN4\_HUMAN IMIGVMSGGILIKNVRMNT---FPLKIVKISFKCKQFFQLRKELHESRETLGNMVNY--RACKNLWKACVEHHTFFRLDRPLPPQKNFF-AHYFTLGSKRYCGRTEVQSVQYG  
41\_HUMAN IILGVCSGGLLVKDKLRINR---FMPKVLIKISYKRSSFQKIRPGEQEYQESTIGFKLPSY--RAAKNLWKVCVEHHTFFRL-TSTDTPK---SKFLALGSKRYSGRTQAOTRQAS  
E4L1\_HUMAN IMIGVCANGLLIRDRRLINR---FAMPKILKISYKRSNFYKIRPGEYEQFESTIGFKLPNH--RSAKNLWKCIEHHHTFFRLVSP--EPPPK---GFLVMGSKRYSGRTQAOTRQAS  
E4L2\_HUMAN IKLGVCANGLLIRKDRRLINR---FAMPKILKISYKRSNFYKVRPAELQFESTIGFKLPNH--RAAKNLWKVCVEHHTFYRLVSP--EQPPK---AKFLTGLGSKRYSGRTQAOTRQAS  
E4L3\_HUMAN IMIGVCASGLLIRDRRLINR---FAMPKVLIKISYKRNFYKIRPGEFEQFESTIGFKLPNH--RAAKNLWKVCVEHHTFFRLLLP--EAPPK---KFLTGLGSKRYSGRTQAOTRQAS  
E4LB\_HUMAN SLGLTPTGILIFEGANKIGLF---FWPKITKMDFKSKLTLVVEDDDQGR--EQHTFVFRLLDSARTCKHKLWCAVEHHTFFRLRTPGNSKSNR--SDFIRLGSRRFPGERTCYATHGS  
Q9Y4F1 INDAVANTGILVFQGFTKINA---INAKVRKLISFKRKRFLKLRPDANSAYQDTLEPLMASR--DFCKSFVKICVEHHTFFRL-FEEPKPKPK--PVLFSRGSFPGERTQKQVLDYV  
E41LA\_HUMA YFGLTPVGVVVKNKKQVGK---YFMPRIKIVHFKETQF--ELRVLGKDCNETSFFFEARSK--TACKHKLWKSCEVHHTFFRMPENESNLSRKLKFGSIRYKHRYSGRTALQMSRDL  
Q86WP8 TFLGFTAAGFVVVFRGNKRIHL---IKMPDVCKLKKEGKTFFV----IGTQKEKKAMLAFTSTPAACKHKLWKCIVENQAYKYA-KSSQIKTVSSSKIFFKGSRYSGKVAKEVVEAS  
EZRI\_HUMAN LWLGVDALGLNIEKDDKLTPKIGFPMSEIRNIFNDKKFVKK----PIDKKAPDFVFYAPRLRINKRIQLQCMGNHELY-MRRRKPDTEVQQMKAQAREEKHQKQLERQQLETEKKRR  
TLN1\_HUMAN LGITKECVMRVDEKTKEVIQEWNLTNIKRWAASPKSFITLDFGDYQDGYYSVQTTEGEQIAQLIAGYIDIIKKKKSKDFGLEGDEESTMLEDSVSPKSTVLQQQYNRVGKVEHGSVAL  
JAK3\_HUMAN FHVSLPGALGGHGLGLLRVAGDGGIAWTQGEQVLFQFCDPFEIVDISIKQAPRVGAGEHRLVTVTRTDNQILEAEFFPLGEALSFVALVDGYFRLLTDSQHFCKEVAQPRLLLEVA  
FAK2\_HUMAN LIQSWNITVDLHVIGPKGIQRLTSQDAKPTCLAEFFKQIRSRICPLLEEGQAVLQGLGEGAPQALSIKTSLSAEAMMDLIDGYCRLQGEHQGSLIHPKDKGKNSLPQIPMLNLBARR  
Consensus/51% lbLGLstsgLlly+sg+bsb+lsb.+.FsWs+lbKLSaKcppFaIcLrssbb-bpEsslsFbb.sp..+tsKpLWKssVEHHSFFRb.ps.srbssp..tcabbsbGS+FRaSGRTbbOsrps

## FA

[illegible]
